# Supplementary material for: Impact of Therapeutic Hypothermia During Cardiopulmonary Resuscitation on Neurologic Outcome: A Systematic Review and Meta-analysis
Source: Research Square preprint supplement (doi:10.21203/rs.3.rs-86996/v1), 2020-10-08
Supplement: Supplementary file 1 [file c07ef57625935b3b8f4d2a9c.docx]

Figure S2
